# Supplementary material for: A metal–organic framework featuring highly sensitive fluorescence sensing for Al3+ ions
Source: Royal Society of Chemistry journal article supplement (doi:10.1039/d1ce01115d), 2021-01-01
Supplement: d1ce01115d1.pdf [file d1ce01115d1.pdf]

## *Electronic Supplementary Information*

### **A metal-organic framework featuring highly sensitive fluorescence sensing for Al<sup>3+</sup> ions**

Yang Qiao,<sup>a</sup> Zeqi Li,<sup>a</sup> Mei-Hui Yu,<sup>\*a</sup> Ze Chang<sup>\*a</sup> and Xian-He Bu<sup>a,b</sup>

<sup>a</sup> School of Materials Science and Engineering, Nankai University, Tianjin 300350, China

<sup>b</sup> College of Chemistry, State Key Laboratory of Elemento-organic Chemistry, Nankai University, Tianjin 300071, China

#### **Experimental section**

##### **Crystal Structure Determination.**

Single crystal X-ray diffraction data of **NKM-102** was measured on a Rigaku XtaLAB MM007 CCD diffractometer at 100 K with Cu K $\alpha$  radiation ( $\lambda = 1.5418 \text{ \AA}$ ) by  $\omega$  scan mode. The structure of **NKM-102** was solved by direct methods using the *SHELXTL* program and refined by full-matrix least-squares methods with *SHELXL*.<sup>S1</sup> All non-hydrogen atoms were refined with anisotropic thermal parameters. The highly disordered solvents molecules were removed through the *SUQEEZE* program in *PLATON*.<sup>S2</sup> The crystallographic data of **NKM-102** were summarized in Table S1, and the selected bond lengths and angles were given in Tables S2 and S3. Full crystallographic data for **NKM-102** have been deposited with the CCDC (2090957).

These data can be obtained free of charge from the Cambridge Crystallographic  
[www.ccdc.cam.ac.uk/data\\_request/cif](http://www.ccdc.cam.ac.uk/data_request/cif).

**Table S1.** Crystallographic data and structure refinement of **NKM-102**.

| <b>Compound reference</b>                                                              | <b>NKM-102</b>                                                                  |
|----------------------------------------------------------------------------------------|---------------------------------------------------------------------------------|
| Chemical formula                                                                       | C <sub>116</sub> H <sub>96</sub> N <sub>6</sub> O <sub>30</sub> Cd <sub>5</sub> |
| Formula Mass                                                                           | 2616.08                                                                         |
| Crystal system                                                                         | Triclinic                                                                       |
| <i>a</i> /Å                                                                            | 8.9895(3)                                                                       |
| <i>b</i> /Å                                                                            | 11.5404(3)                                                                      |
| <i>c</i> /Å                                                                            | 33.0283(7)                                                                      |
| $\alpha$ /°                                                                            | 95.255(2)                                                                       |
| $\beta$ /°                                                                             | 96.857(2)                                                                       |
| $\gamma$ /°                                                                            | 102.441(2)                                                                      |
| Unit cell volume/Å <sup>3</sup>                                                        | 3297.64(16)                                                                     |
| Temperature/K                                                                          | 99.99(10)                                                                       |
| Space group                                                                            | <i>P</i>                                                                        |
| No. of formula units per unit cell, <i>Z</i>                                           | 1                                                                               |
| Radiation type                                                                         | Cu K $\alpha$                                                                   |
| Absorption coefficient, $\mu$ /mm <sup>-1</sup>                                        | 6.897                                                                           |
| No. of reflections measured                                                            | 26545                                                                           |
| No. of independent reflections                                                         | 12920                                                                           |
| <i>R</i> <sub>int</sub>                                                                | 0.0440                                                                          |
| Final <i>R</i> <sub><i>I</i></sub> values ( <i>I</i> > 2 $\sigma$ ( <i>I</i> ))        | 0.0668                                                                          |
| Final <i>wR</i> ( <i>F</i> <sup>2</sup> ) values ( <i>I</i> > 2 $\sigma$ ( <i>I</i> )) | 0.1712                                                                          |
| Final <i>R</i> <sub><i>I</i></sub> values (all data)                                   | 0.0721                                                                          |
| Final <i>wR</i> ( <i>F</i> <sup>2</sup> ) values (all data)                            | 0.1748                                                                          |
| Goodness of fit on <i>F</i> <sup>2</sup>                                               | 1.049                                                                           |

**Table S2.** Selected bond lengths (Å) for **NKM-102**.

|              |          |               |          |
|--------------|----------|---------------|----------|
| Cd(1)-O(5)#6 | 2.349(4) | Cd(2)-O(2)    | 2.363(3) |
| Cd(1)-O(7)   | 2.218(4) | Cd(2)-O(15)   | 2.289(5) |
| Cd(1)-O(2)#6 | 2.372(5) | Cd(2)-C(1)    | 2.749(6) |
| Cd(1)-O(14)  | 2.301(5) | Cd(2)-C(31)   | 2.736(6) |
| Cd(1)-O(3)   | 2.213(6) | Cd(3)-O(11)#1 | 2.221(4) |
| Cd(1)-O(13)  | 2.270(8) | Cd(3)-O(11)   | 2.221(4) |
| Cd(2)-O(5)   | 2.479(4) | Cd(3)-O(10)#2 | 2.337(4) |

|                                            |          |               |          |
|--------------------------------------------|----------|---------------|----------|
| Cd(2)-O(1)                                 | 2.441(4) | Cd(3)-O(10)#3 | 2.337(4) |
| Cd(2)-O(6)                                 | 2.316(4) | Cd(3)-N(2)#4  | 2.314(5) |
| Cd(2)-N(1)                                 | 2.278(4) | Cd(3)-N(2)#5  | 2.314(5) |
| Cd(2)-O(8)#2                               | 2.316(4) |               |          |
| #1 3-X,3-Y,2-Z #2 +X,1+Y,+Z #3 3-X,2-Y,2-Z |          |               |          |
| #4 2+X,+Y,+Z #5 1-X,3-Y,2-Z #6 +X,-1+Y,+Z  |          |               |          |

**Table S3.** Selected bond angles (°) for **NKM-102**.

|                                            |            |                     |            |
|--------------------------------------------|------------|---------------------|------------|
| O(8)#6-Cd(1)-O(10)#6                       | 82.00(18)  | O(7)-Cd(2)-O(10)    | 132.7(2)   |
| O(1)-Cd(1)-O(8)#6                          | 88.0(2)    | O(7)-Cd(2)-C(28)    | 27.1(2)    |
| O(1)-Cd(1)-O(10)#6                         | 91.9(2)    | O(7)-Cd(2)-C(43)    | 160.5(2)   |
| O(1)-Cd(1)-O(15)                           | 90.6(2)    | N(1)-Cd(2)-O(8)     | 141.42(18) |
| O(1)-Cd(1)-O(14)                           | 90.9(4)    | N(1)-Cd(2)-O(9)     | 86.33(19)  |
| O(15)-Cd(1)-O(8)#6                         | 96.9(2)    | N(1)-Cd(2)-O(7)     | 87.1(2)    |
| O(15)-Cd(1)-O(10)#6                        | 177.2(2)   | N(1)-Cd(2)-O(23)    | 86.0(2)    |
| O(11)-Cd(1)-O(8)#6                         | 88.3(3)    | O(10)-Cd(2)-C(28)   | 106.0(2)   |
| O(11)-Cd(1)-O(1)                           | 176.1(3)   | O(10)-Cd(2)-C(43)   | 27.8(2)    |
| O(11)-Cd(1)-O(10)#6                        | 86.3(3)    | O(13)-Cd(2)-O(8)    | 84.8(2)    |
| O(11)-Cd(1)-O(15)                          | 91.2(3)    | O(13)-Cd(2)-O(9)    | 84.6(2)    |
| O(11)-Cd(1)-O(14)                          | 92.6(5)    | O(13)-Cd(2)-O(7)    | 91.6(2)    |
| O(8)-Cd(2)-C(43)                           | 106.67(19) | C(43)-Cd(2)-C(28)   | 133.6(2)   |
| O(9)-Cd(2)-O(8)                            | 132.19(17) | O(10)-Cd(2)-O(9)    | 55.05(18)  |
| O(9)-Cd(2)-C(28)                           | 159.4(2)   | O(5)-Cd(3)-O(5)#1   | 180.0      |
| O(9)-Cd(2)-C(43)                           | 27.3(2)    | O(5)-Cd(3)-O(3)#2   | 98.1(2)    |
| O(7)-Cd(2)-O(8)                            | 54.33(18)  | O(5)#1-Cd(3)-O(3)#3 | 98.1(2)    |
| O(7)-Cd(2)-O(9)                            | 171.8(2)   | O(5)-Cd(3)-O(3)#3   | 81.9(2)    |
| N(1)-Cd(2)-O(10)                           | 137.7(2)   | O(5)#1-Cd(3)-O(3)#2 | 81.9(2)    |
| N(1)-Cd(2)-O(13)                           | 99.2(2)    | O(5)-Cd(3)-N(2)#4   | 92.4(2)    |
| N(1)-Cd(2)-C(28)                           | 114.1(2)   | O(5)-Cd(3)-N(2)#5   | 87.6(2)    |
| N(1)-Cd(2)-C(43)                           | 111.6(2)   | O(5)#1-Cd(3)-N(2)#5 | 92.4(2)    |
| O(23)-Cd(2)-O(8)                           | 89.5(2)    | O(5)#1-Cd(3)-N(2)#4 | 87.6(2)    |
| O(23)-Cd(2)-O(9)                           | 98.5(2)    | O(3)#3-Cd(3)-O(3)#2 | 180.0(2)   |
| O(23)-Cd(2)-O(7)                           | 85.9(2)    | N(2)#5-Cd(3)-O(3)#3 | 96.07(19)  |
| O(23)-Cd(2)-O(10)                          | 83.8(2)    | N(2)#4-Cd(3)-O(3)#2 | 96.07(19)  |
| O(23)-Cd(2)-C(28)                          | 86.0(2)    | N(2)#5-Cd(3)-O(3)#2 | 83.93(19)  |
| O(23)-Cd(2)-C(43)                          | 89.8(2)    | N(2)#4-Cd(3)-O(3)#3 | 83.93(19)  |
| O(10)-Cd(2)-O(8)                           | 79.46(18)  | N(2)#4-Cd(3)-N(2)#5 | 180.0      |
| #1 3-X,3-Y,2-Z #2 +X,1+Y,+Z #3 3-X,2-Y,2-Z |            |                     |            |
| #4 2+X,+Y,+Z #5 1-X,3-Y,2-Z #6 +X,-1+Y,+Z  |            |                     |            |

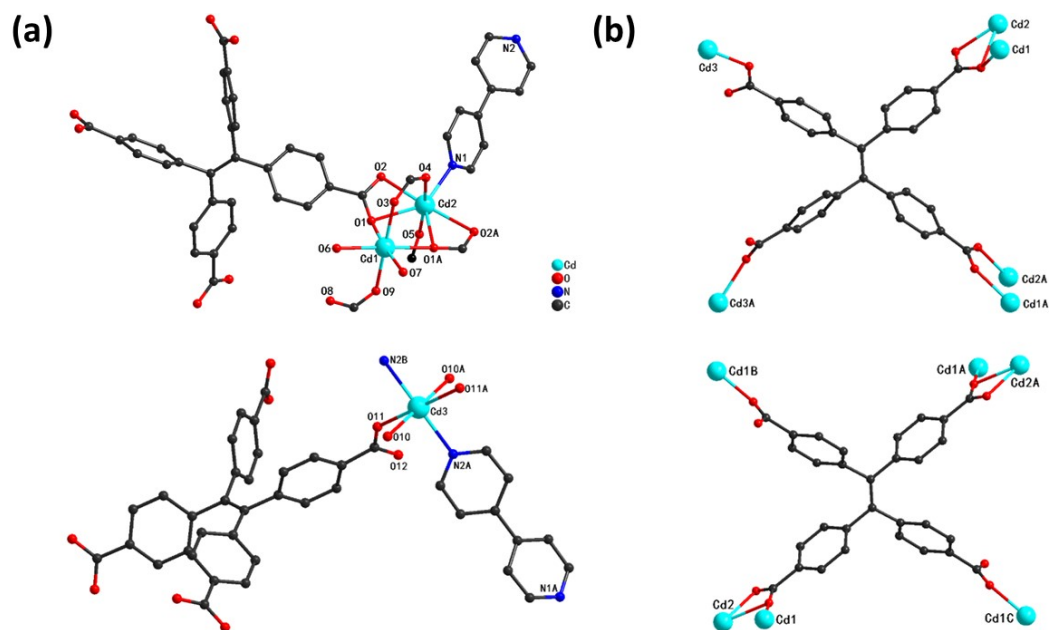

**Fig. S1.** (a) The coordination environment of Cd(II) ion in NKM-102; (b) The coordination modes of the deprotonated TCPE<sup>4-</sup> ligand.

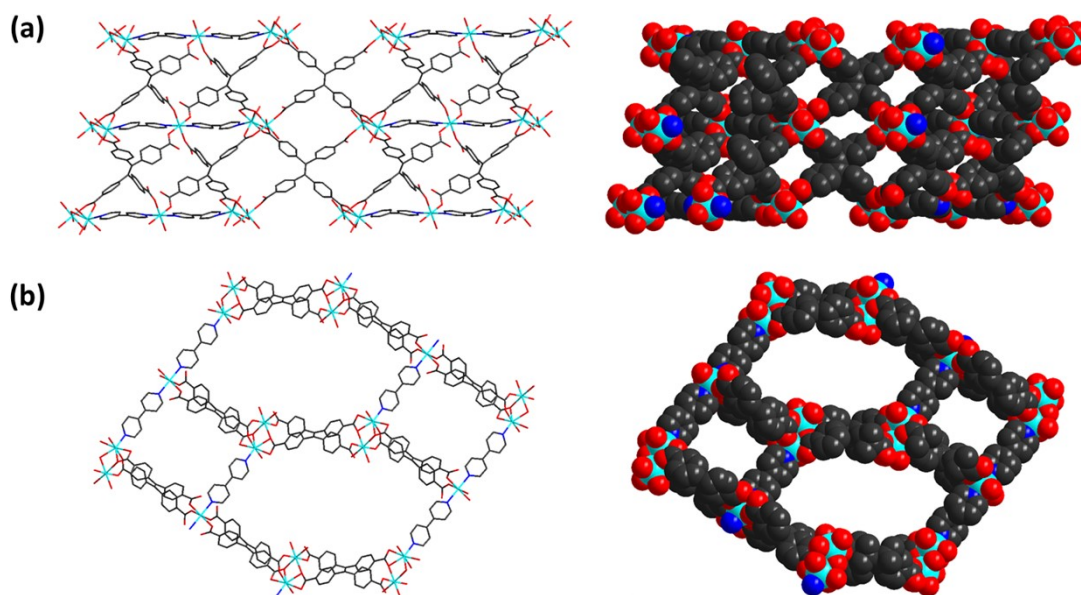

**Fig. S2.** (a) The structure of NKM-102 viewed along *a* axis; (b) The structure of NKM-102 viewed along *b* axis.

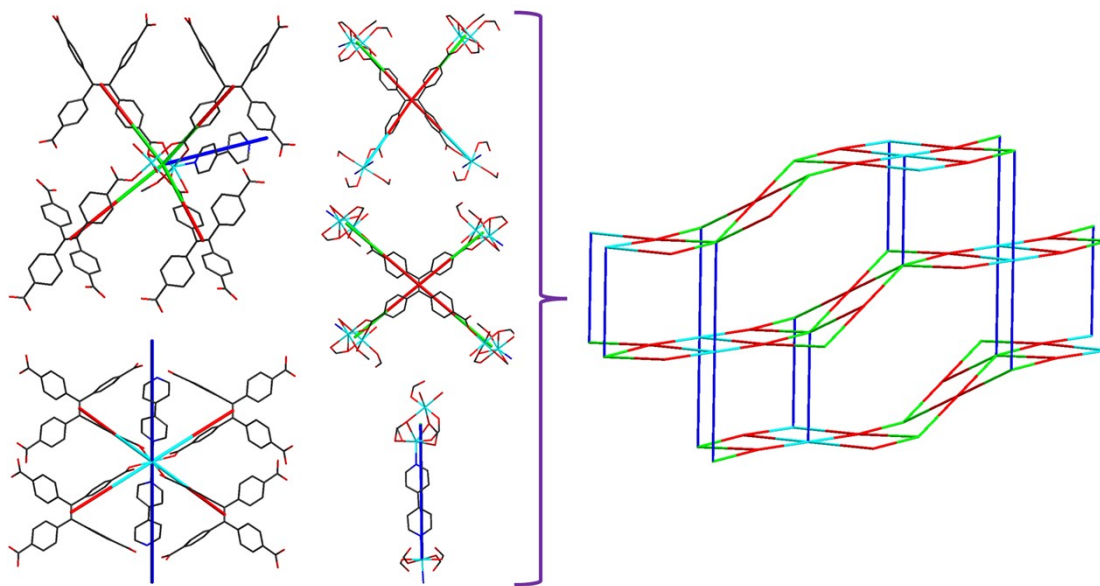

**Fig. S3.** The framework topology of (4, 4, 5, 6)-connected network with point (Schläfli) symbol of  $\{4^4 \cdot 6^{10} \cdot 8\} \{4^4 \cdot 6^2\}_3 \{4^4 \cdot 6^6\}_2$ .

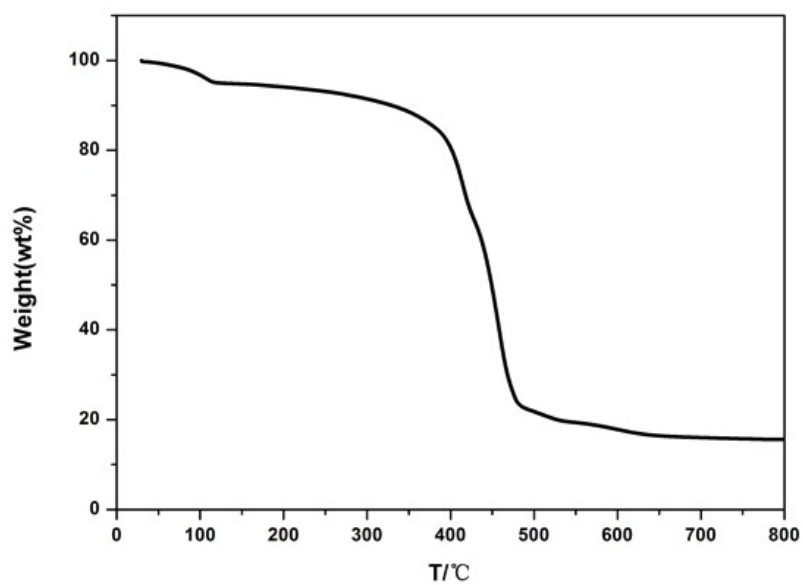

**Fig. S4.** TGA curve of NKM-102.

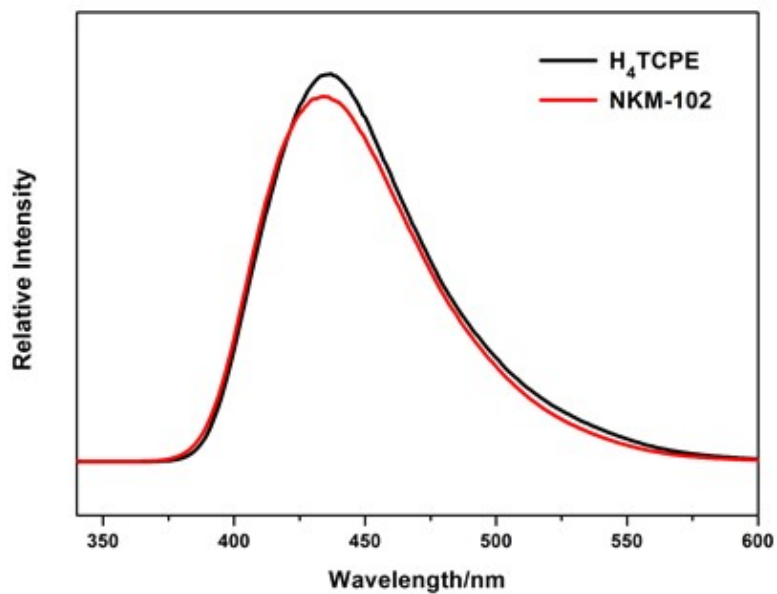

**Fig. S5.** The solid-state fluorescence spectra of H<sub>4</sub>TCPE ligand and NKM-102.

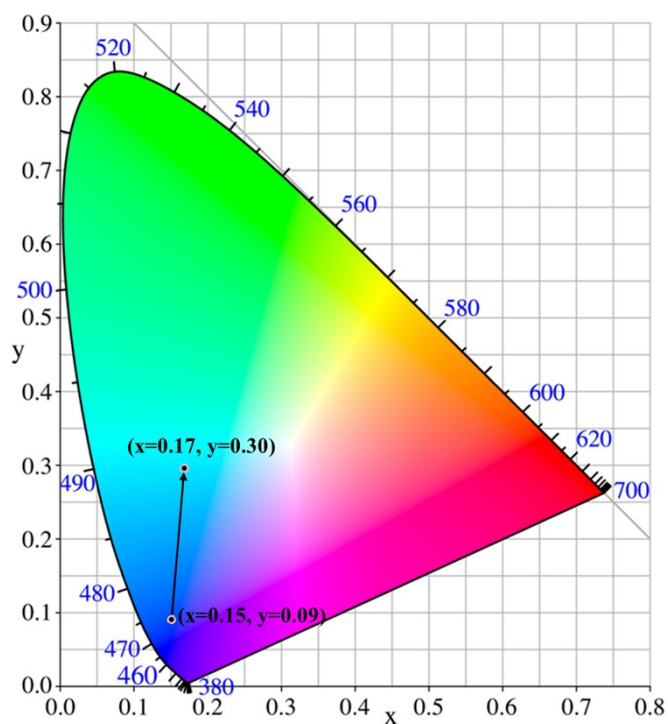

**Fig. S6.** The CIE chromaticity diagram showing the color coordinates of NKM-102 and NKM-102 upon the addition of Al<sup>3+</sup> ions in C<sub>2</sub>H<sub>5</sub>OH.

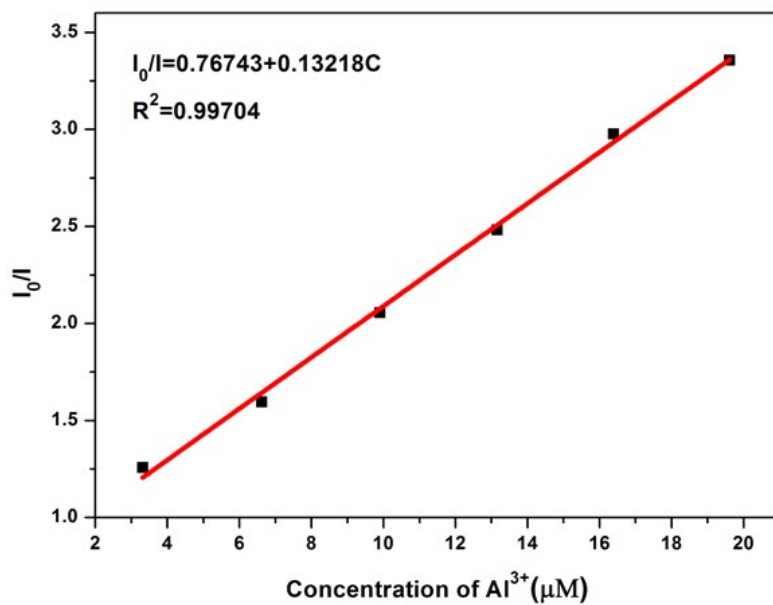

**Fig. S7.** Fitting plot of the detection limit Al<sup>3+</sup> ions in C<sub>2</sub>H<sub>5</sub>OH solution for NKM-102.

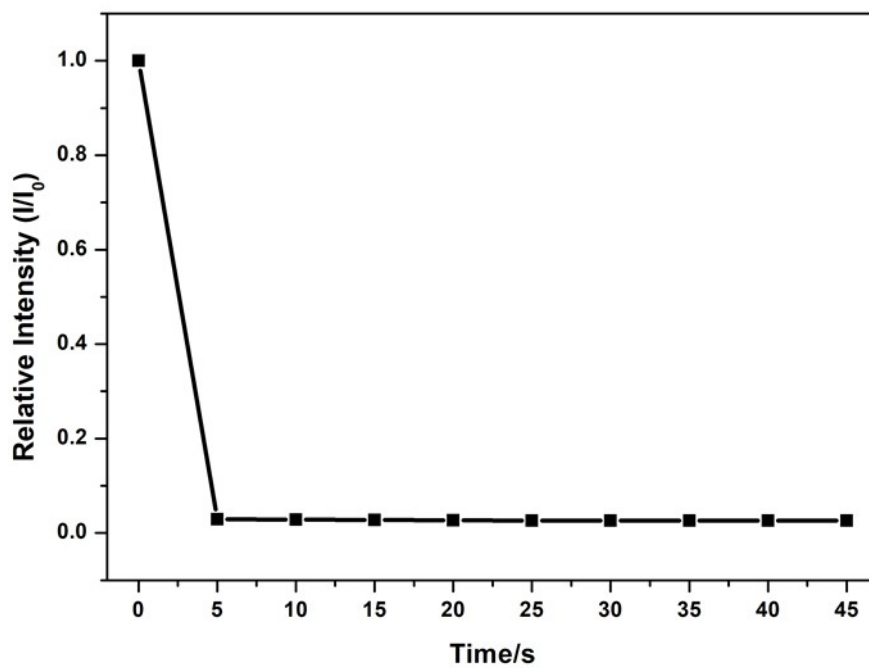

**Fig. S8.** Time-dependent response of the emission of NKM-102 toward Al<sup>3+</sup> ions in C<sub>2</sub>H<sub>5</sub>OH solution.

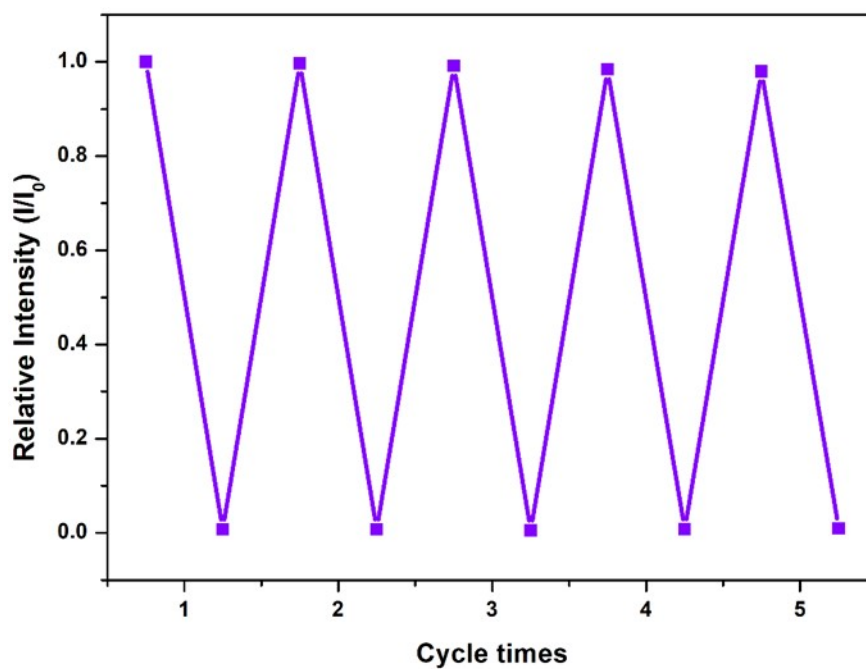

**Fig. S9.** Recycle sensing performances of NKM-102 toward  $\text{Al}^{3+}$  ions in  $\text{C}_2\text{H}_5\text{OH}$  solution.

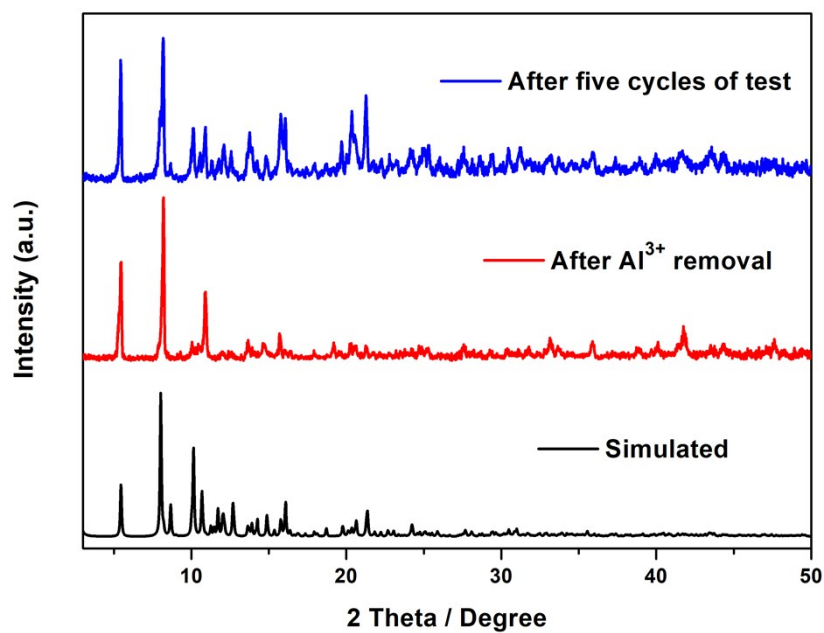

**Fig. S10.** The PXRD patterns of NKM-102 after  $\text{Al}^{3+}$  ions removal and after five consecutive cycles of fluorescence sensing experiments.



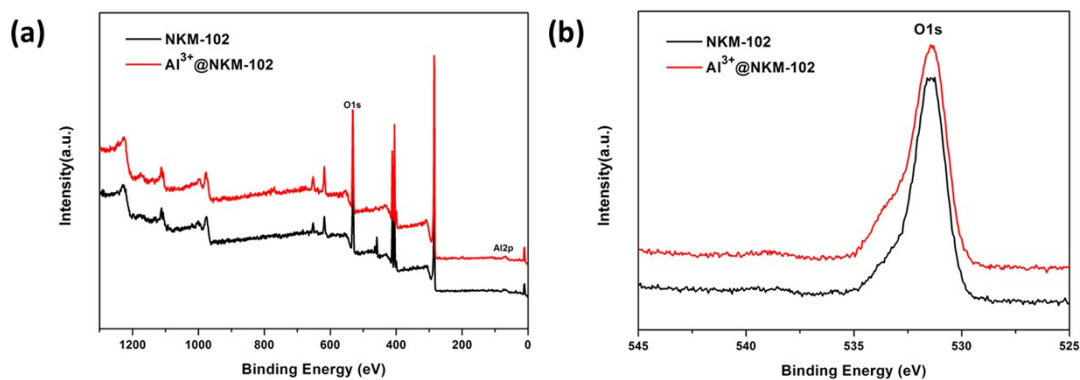

**Fig. S11.** XPS spectra (a) and O 1s XPS spectra (b) for **NKM-102** (black line) and **Al<sup>3+</sup>@NKM-102** (derived from immersing **NKM-102** into Al<sup>3+</sup> ions solution; red line).

**Table S4.** Comparison of literature reports for MOFs as sensors of Al<sup>3+</sup> ions.

| MOF                                                                                                                          | Detection Limit                         | Ref.             |
|------------------------------------------------------------------------------------------------------------------------------|-----------------------------------------|------------------|
| <b>NKM-102</b>                                                                                                               | <b>5.86 <math>\mu</math>M (158 ppb)</b> | <b>this work</b> |
| Cd <sub>2</sub> (syn-dftpmcp)(1,3-BDC) <sub>2</sub>                                                                          | 183 ppb                                 | S3               |
| UiO-66-NH <sub>2</sub> -SA                                                                                                   | 6.98 $\mu$ M (188 ppb)                  | S4               |
| {[Zn <sub>2</sub> ( $\mu$ <sub>3</sub> -HCIP) <sub>2</sub> ( $\mu$ -bpt)]·2H <sub>2</sub> O} <sub>n</sub>                    | 760 ppb                                 | S5               |
| {[Co <sub>3</sub> (phen) <sub>2</sub> HL) <sub>2</sub> ·(H <sub>2</sub> O) <sub>2</sub> ] <sub>n</sub>                       | 960 ppb                                 | S6               |
| [H <sub>3</sub> O] <sub>2</sub> [Eu <sub>2.5</sub> (BTB) <sub>3</sub> (OAc) <sub>0.5</sub> (H <sub>2</sub> O) <sub>3</sub> ] | 100 $\mu$ M (2.70*10 <sup>3</sup> ppb)  | S7               |
| [Co <sub>2</sub> (dmimpym)(nda) <sub>2</sub> ] <sub>n</sub>                                                                  | 1.89*10 <sup>4</sup> ppb                | S8               |
| Tb-TCPP                                                                                                                      | 7.79 nM (0.21 ppb)                      | S9               |
| GUPT-2                                                                                                                       | 0.269 $\mu$ M (7.26 ppb)                | S10              |
| [CuI(BPDPE)] <sub>n</sub>                                                                                                    | 2.1 $\mu$ M (56.66 ppb)                 | S11              |
| UiO-(OH) <sub>2</sub> @RhB                                                                                                   | 10 nM (0.27 ppb)                        | S12              |

## References

- S1. G. M. Sheldrick, *Acta Cryst.*, 2014, **C71**, 3-8.
- S2. A. L. Spek, *J. Appl. Cryst.*, 2003, **36**, 7-13.
- S3. W. Li, J. Gu, H. Li, M. Dai, D. J. Young, H. Li and J. Lang, *Inorg. Chem.*, 2018, **57**, 13453-13460.

- S4. S. Zhu and B. Yan, *Dalton Trans.*, 2018, **47**, 1674-1681.
- S5. M. Arici, *New J. Chem.*, 2019, **43**, 3690.
- S6. Y. Liu, C. Liu, X. Zhang, L. Liu, C. Ge, X. Zhuang, N. Zhang, Q. Yang, Y. Huang and Z. Zhang, *J. Solid State Chem.*, 2019, **272**, 1.
- S7. H. Xu, M. Fang, C. Cao, W. Qiao and B. Zhao, *Inorg. Chem.*, 2016, **55**, 4790.
- S8. W. Chen, X. Meng, G. Zhuang, Z. Wang, M. Kurmoo, Q. Zhao, X. Wang, B. Shan, C. Tung and D. Sun, *J. Mater. Chem. A*, 2017, **5**, 13079.
- S9. C. Fu, X. Sun, G. Zhang, P. Shi and P. Cui, *Inorg. Chem.*, 2021, **60**, 1116-1123.
- S10. S. Wang, X. Zheng, S. Zhang, G. Li and Y. Xiao, *CrystEngComm*, 2021, **23**, 4059-4068.
- S11. K. Wu, J. Hu, X. Cheng, J. Li and C. Zhou, *Journal of Luminescence*, 2020, **219**, 116908.
- S12. X. Zheng, Y. Zhao, P. Jia, Q. Wang, Y. Liu, T. Bu, M. Zhang, F. Bai, and L. Wang, *Inorg. Chem.*, 2020, **59**, 18205-18213.
